# Supplementary material for: Study on Extra Virgin Olive Oil: Quality Evaluation by Anti-Radical Activity, Color Analysis, and Polyphenolic HPLC-DAD Analysis
Source: MDPI journal article supplement (doi:10.3390/foods10081808), 2021-08-05
Supplement: s1 [file s1]

# **Study on extra virgin olive oil: quality evaluation by anti-radical activity, color analysis and polyphenolic HPLC-DAD analysis**

Francesco Cairone, Stefania Petralito, Luigi Scipione, Stefania Cesa\*

Department of Drug Chemistry and Technology, “La Sapienza” University of Rome, P.le Aldo Moro, 5, 00185 Rome, Italy; francesco.cairone@uniroma1.it, stefania.petralito@uniroma1.it, luigi.scipione@uniroma1.it.

\*Correspondence: stefania.cesa@uniroma1.it Tel.: +390649913133

| MILL<br>samples | MILL<br>samples | ITA<br>samples | EUR<br>samples |
|-----------------|-----------------|----------------|----------------|
| <b>A1</b>       | <b>L10</b>      | <b>Ar</b>      | <b>Aa</b>      |
| <b>B1</b>       | <b>L11</b>      | <b>Au</b>      | <b>Ac</b>      |
| <b>C1</b>       | <b>L12</b>      | <b>Ca</b>      | <b>Ai</b>      |
| <b>C2</b>       | <b>L13</b>      | <b>Cc</b>      | <b>Be</b>      |
| <b>C3</b>       | <b>M1</b>       | <b>Ce</b>      | <b>Cf</b>      |
| <b>L1</b>       | <b>P1</b>       | <b>Cp</b>      | <b>Cm</b>      |
| <b>L2</b>       | <b>P2</b>       | <b>Ct</b>      | <b>Co</b>      |
| <b>L3</b>       | <b>P3</b>       | <b>Cv</b>      | <b>Cr</b>      |
| <b>L4</b>       | <b>P4</b>       | <b>Ds</b>      | <b>Dc</b>      |
| <b>L5</b>       | <b>P5</b>       | <b>Fb</b>      | <b>Dn</b>      |
| <b>L6</b>       | <b>S1</b>       | <b>Ma</b>      | <b>Gi</b>      |
| <b>L7</b>       | <b>T1</b>       | <b>Pa</b>      | <b>Lr</b>      |
| <b>L8</b>       | <b>T2</b>       | <b>Sa</b>      | <b>Sp</b>      |
| <b>L9</b>       | <b>U1</b>       |                |                |

**Table S1.** Legend of analysed oil samples.

|                        | <b>A1</b> | <b>B1</b> | <b>C1</b> | <b>C2</b> | <b>C3</b> | <b>L1</b> | <b>L2</b> | <b>L3</b> | <b>L4</b> | <b>L5</b> | <b>L6</b> | <b>L7</b> | <b>L8</b> | <b>L9</b> |
|------------------------|-----------|-----------|-----------|-----------|-----------|-----------|-----------|-----------|-----------|-----------|-----------|-----------|-----------|-----------|
| <b>K<sub>232</sub></b> | 1.72      | 0.41      | 0.14      | 1.97      | 2.32      | -1.21     | 1.40      | 0.16      | 0.10      | 1.96      | 1.95      | 2.07      | 1.71      | 1.71      |
| <b>K<sub>270</sub></b> | 0.14      | 0.15      | 0.06      | 0.20      | 0.28      | -1.26     | 0.27      | 0.04      | 0.03      | -0.03     | 0.19      | -0.64     | -1.04     | -1.04     |
| <b>ΔK</b>              | -0.004    | -0.007    | -0.001    | -0.009    | 0.001     | -0.003    | 0.031     | -0.003    | -0.002    | 0.053     | 0.001     | -0.037    | -0.039    | -0.039    |
| <b>Car*</b>            | 0.018     | 0.017     | 0.033     | 0.028     | 0.017     | 0.048     | 0.042     | 0.021     | 0.038     | 0.015     | 0.021     | 0.036     | 0.038     | 0.016     |
| <b>Chlor**</b>         | 0.013     | 0.001     | 0.002     | 0.021     | 0.009     | 0.030     | 0.069     | 0.012     | 0.028     | 0.006     | 0.015     | 0.039     | 0.029     | 0.012     |

|                        |            |            |            |            |           |           |           |           |           |           |           |           |           |           |
|------------------------|------------|------------|------------|------------|-----------|-----------|-----------|-----------|-----------|-----------|-----------|-----------|-----------|-----------|
| <b>DPPH***</b>         | 89.4       | 29.1       | 37.7       | 122.8      | 34.4      | 154.0     | 72.3      | 71.1      | 96.1      | 57.1      | 237.5     | 83.4      | 136.0     | 41.5      |
|                        | <b>L10</b> | <b>L11</b> | <b>L12</b> | <b>L13</b> | <b>M1</b> | <b>P1</b> | <b>P2</b> | <b>P3</b> | <b>P4</b> | <b>P5</b> | <b>S1</b> | <b>T1</b> | <b>T2</b> | <b>U1</b> |
| <b>K<sub>232</sub></b> | 1.22       | 3.57       | 1.79       | 1.50       | 2.39      | 0.14      | 2.32      | 2.47      | 3.17      | 3.17      | 0.14      | 0.17      | 2.79      | 1.61      |
| <b>K<sub>270</sub></b> | 0.11       | 0.47       | 0.12       | 0.11       | 0.27      | 0.04      | 0.27      | 0.32      | 0.42      | 0.26      | 0.03      | 0.03      | 0.31      | 0.32      |
| <b>ΔK</b>              | -0.003     | 0.002      | 0.002      | -0.001     | -0.003    | -0.003    | -0.004    | 0.002     | 0.001     | -0.003    | -0.002    | 0.001     | -0.002    | 0.004     |
| <b>Car*</b>            | 0.008      | 0.002      | 0.021      | 0.115      | 0.018     | 0.061     | 0.018     | 0.031     | 0.005     | 0.031     | 0.014     | 0.023     | 0.018     | 0.005     |
| <b>Chlor**</b>         | 0.005      | 0.012      | 0.015      | 0.100      | 0.007     | 0.036     | 0.016     | 0.006     | 0.007     | 0.014     | 0.022     | 0.015     | 0.015     | 0.008     |
| <b>DPPH***</b>         | 57.0       | 8.3        | 51.4       | 43.2       | 14.7      | 115.4     | 7.4       | 71.4      | 135.0     | 85.5      | 42.7      | 92.8      | 39.8      | 28.3      |
|                        | <b>Ar</b>  | <b>Au</b>  | <b>Ca</b>  | <b>Cc</b>  | <b>Ce</b> | <b>Cp</b> | <b>Ct</b> | <b>Cv</b> | <b>Ds</b> | <b>Fb</b> | <b>Ma</b> | <b>Pa</b> | <b>Sa</b> |           |
| <b>K<sub>232</sub></b> | 2.36       | 2.56       | 1.96       | 0.20       | 1.93      | 0.20      | 0.19      | 0.17      | 1.31      | 1.12      | 2.78      | 2.84      | 2.31      |           |
| <b>K<sub>270</sub></b> | 0.22       | 0.27       | 0.22       | 0.09       | 0.16      | 0.04      | 0.03      | 0.03      | 0.15      | 0.14      | 0.17      | 0.44      | 0.21      |           |
| <b>ΔK</b>              | 0.001      | 0.002      | -0.004     | -0.002     | 0.001     | -0.070    | -0.003    | -0.003    | -0.002    | 0.001     | -0.005    | -0.004    | 0.003     |           |
| <b>Car*</b>            | 0.018      | 0.015      | 0.030      | 0.023      | 0.016     | 0.021     | 0.029     | 0.022     | 0.020     | 0.034     | 0.040     | 0.019     | 0.033     |           |
| <b>Chlor**</b>         | 0.009      | 0.038      | 0.027      | 0.024      | 0.012     | 0.021     | -         | -         | -         | 0.029     | 0.034     | 0.046     | 0.015     |           |
| <b>DPPH***</b>         | 26.0       | 15.3       | 224.9      | 25.0       | 259.7     | 266.1     | 17.4      | 17.7      | 198.2     | 91.7      | 38.2      | 13.4      | 293.2     |           |
|                        | <b>Aa</b>  | <b>Ac</b>  | <b>Ai</b>  | <b>Be</b>  | <b>Cf</b> | <b>Cm</b> | <b>Co</b> | <b>Cr</b> | <b>Dc</b> | <b>Dn</b> | <b>Gi</b> | <b>Lr</b> | <b>Sp</b> |           |
| <b>K<sub>232</sub></b> | -0.39      | 2.66       | -0.25      | -0.01      | 2.63      | 1.96      | 1.66      | 1.95      | 2.41      | 1.52      | 2.04      | -0.04     | 1.84      |           |
| <b>K<sub>270</sub></b> | 0.03       | 0.21       | 0.04       | 0.05       | 0.16      | 0.15      | 0.12      | 0.19      | 1.46      | 0.20      | 0.25      | 0.04      | 0.18      |           |
| <b>ΔK</b>              | -0.003     | -0.004     | 0.001      | -0.003     | -0.005    | -0.005    | -0.003    | 0.001     | 0.032     | -0.051    | 0.046     | -0.002    | 0.005     |           |
| <b>Car*</b>            | 0.013      | 0.017      | 0.032      | 0.024      | 0.029     | 0.021     | 0.037     | 0.019     | 0.022     | 0.026     | 0.026     | 0.016     | 0.022     |           |
| <b>Chlor**</b>         | 0.013      | 0.014      | 0.015      | 0.010      | 0.029     | 0.013     | 0.032     | 0.014     | 0.018     | 0.022     | -         | -         | 0.015     |           |
| <b>DPPH***</b>         | 40.0       | 17.9       | 54.6       | 31.6       | 85.5      | 184.3     | 54.4      | 53.5      | 40.4      | 38.7      | 49.5      | 43.1      | 143.0     |           |

**Table S2.** Spectrophotometric data of all analysed samples.

\*Carotenoids detected at 470 nm,\*\*Chlorophylls detected at 670 nm and expressed as absorbance of oils solution (100 mg in 5 mL n-hexane); \*\*\*expressed as µg equivalents of gallic acid/g of oil

|                  | A1    | B1    | C1    | C2    | C3    | L1    | L2    | L3    | L4    | L5    | L6    | L7    | L8    | L9    |
|------------------|-------|-------|-------|-------|-------|-------|-------|-------|-------|-------|-------|-------|-------|-------|
| L*               | 47.60 | 54.90 | 45.50 | 45.20 | 56.60 | 42.30 | 36.50 | 51.30 | 44.00 | 48.50 | 49.70 | 41.60 | 38.60 | 43.10 |
| a*               | 0.80  | 0.10  | 2.50  | 2.90  | 0.60  | 2.70  | 0.70  | 3.30  | 3.20  | 0.90  | 4.10  | 4.20  | 1.00  | 1.60  |
| b*               | 18.50 | 46.80 | 33.60 | 30.20 | 50.50 | 29.60 | 13.30 | 44.00 | 33.70 | 20.90 | 41.30 | 27.90 | 17.70 | 30.60 |
| C* <sub>ab</sub> | 18.50 | 46.80 | 33.70 | 30.50 | 50.50 | 29.70 | 13.35 | 44.10 | 33.90 | 20.90 | 41.50 | 28.20 | 17.80 | 30.60 |
| h <sub>ab</sub>  | 87.70 | 89.90 | 85.80 | 84.60 | 89.40 | 84.70 | 87.00 | 85.70 | 84.50 | 87.70 | 84.30 | 81.40 | 86.60 | 86.90 |
|                  | L10   | L11   | L12   | L13   | M1    | P1    | P2    | P3    | P4    | P5    | S1    | T1    | T2    | U1    |
| L*               | 55.90 | 49.80 | 51.30 | 53.30 | 52.30 | 43.90 | 50.00 | 53.10 | 56.50 | 51.30 | 43.60 | 47.10 | 51.10 | 39.70 |
| a*               | 0.75  | 0.00  | 1.50  | 1.80  | 3.70  | 1.90  | 4.20  | 5.00  | -1.10 | 4.70  | 4.70  | 3.90  | 3.30  | 2.20  |
| b*               | 48.50 | 6.40  | 39.40 | 47.80 | 46.50 | 30.90 | 42.50 | 48.00 | 44.70 | 45.00 | 32.30 | 35.70 | 43.90 | 24.10 |
| C* <sub>ab</sub> | 48.50 | 6.40  | 39.40 | 47.80 | 46.60 | 30.90 | 42.70 | 48.30 | 44.70 | 45.20 | 32.70 | 35.90 | 44.00 | 24.20 |
| h <sub>ab</sub>  | 89.20 | 89.90 | 87.90 | 87.90 | 85.30 | 86.50 | 84.40 | 84.00 | 91.40 | 84.00 | 81.60 | 83.80 | 85.80 | 84.90 |
|                  | Ar    | Au    | Ca    | Cc    | Ce    | Cp    | Ct    | Cv    | Ds    | Fb    | Ma    | Pa    | Sa    |       |
| L*               | 50.30 | 53.50 | 48.00 | 49.90 | 46.30 | 49.80 | 51.40 | 50.80 | 46.40 | 55.50 | 47.70 | 49.20 | 52.50 |       |
| a*               | 3.70  | 1.30  | 4.90  | 4.90  | 1.70  | 4.80  | 3.60  | 4.60  | 2.70  | 4.40  | 0.80  | 3.60  | 3.20  |       |
| b*               | 42.70 | 46.40 | 39.30 | 42.40 | 19.00 | 42.40 | 44.10 | 43.60 | 25.70 | 52.10 | 9.10  | 40.40 | 46.50 |       |
| C* <sub>ab</sub> | 42.80 | 46.40 | 39.60 | 42.60 | 19.10 | 42.60 | 44.30 | 43.90 | 25.90 | 52.20 | 9.20  | 40.60 | 46.60 |       |
| h <sub>ab</sub>  | 85.00 | 88.40 | 82.90 | 83.40 | 85.10 | 83.60 | 85.30 | 84.00 | 84.00 | 85.10 | 85.10 | 85.20 | 86.30 |       |
|                  | Aa    | Ac    | Ai    | Be    | Cf    | Cm    | Co    | Cr    | Dc    | Dn    | Gi    | Lr    | Sp    |       |
| L*               | 51.80 | 52.20 | 52.10 | 52.80 | 55.70 | 51.40 | 44.00 | 51.40 | 49.30 | 51.40 | 50.60 | 51.70 | 53.30 |       |
| a*               | 3.80  | 2.80  | 3.70  | 3.30  | 4.50  | 3.60  | 3.20  | 3.60  | 4.70  | 4.00  | 3.70  | 3.70  | 2.00  |       |
| b*               | 45.10 | 45, 6 | 45.20 | 46.50 | 51.90 | 44.10 | 31.00 | 44.10 | 41.50 | 44.70 | 43.30 | 45.00 | 47.40 |       |
| C* <sub>ab</sub> | 45.30 | 45.70 | 45.30 | 46.60 | 52.10 | 44.30 | 31.20 | 44.30 | 41.70 | 44.80 | 43.50 | 45.20 | 47.40 |       |
| h <sub>ab</sub>  | 85.20 | 86.50 | 85.30 | 86.00 | 85.10 | 85.30 | 84.10 | 85.30 | 83.40 | 84.80 | 85.10 | 85.30 | 87.60 |       |

**Table S3.** Colorimetric data of the analysed samples.

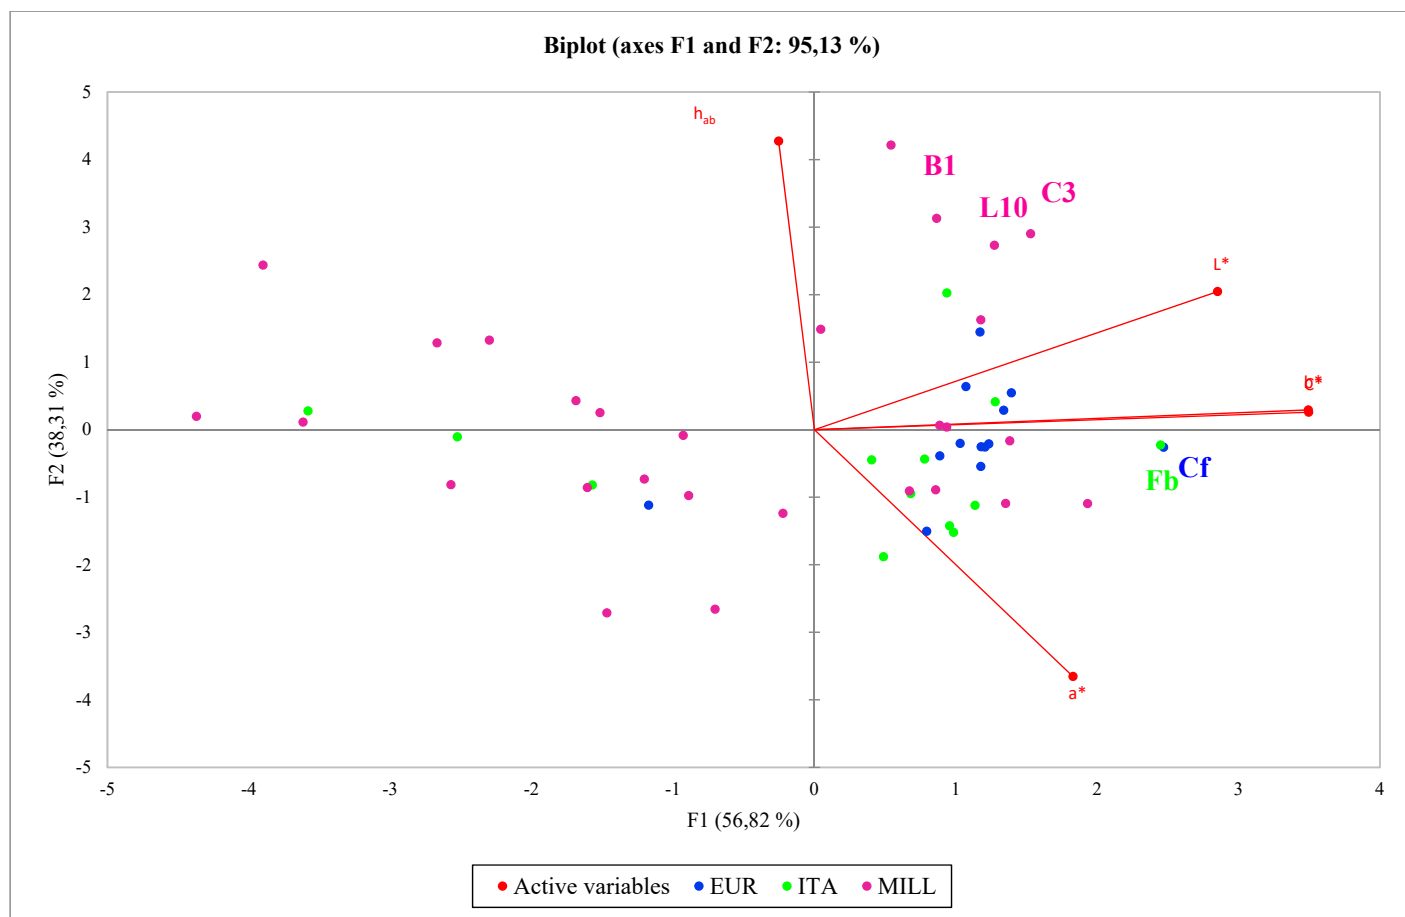

**Figure S1.** Principal component analysis (PCA) of all analysed samples.

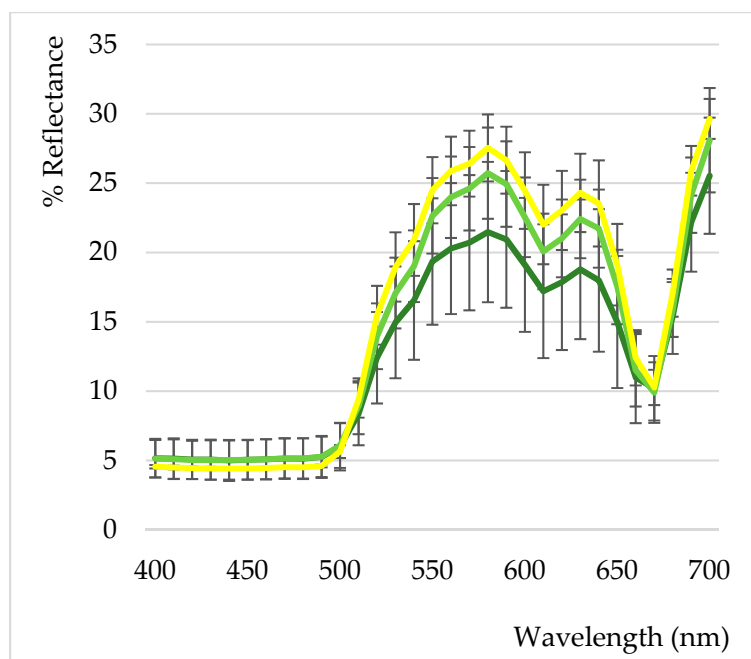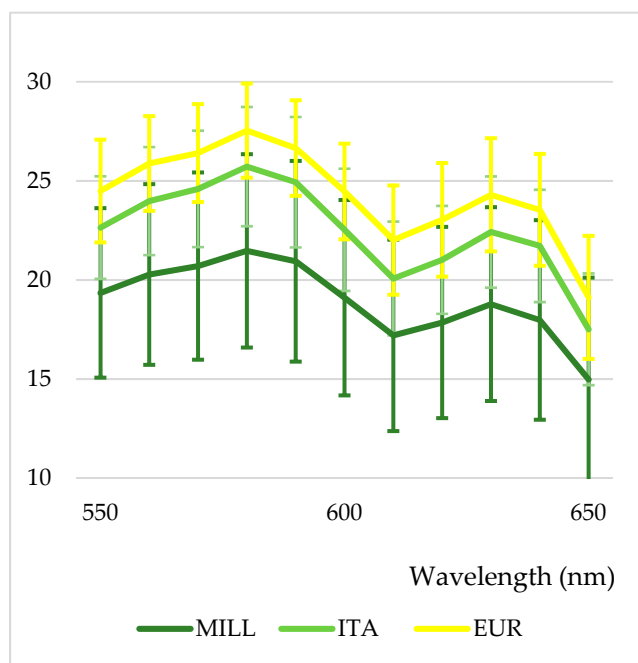

**Figure S2.** Reflectance curves of selected samples.

|                            | A1    | B1    | C1    | C2    | C3    | L1    | L2    | L3    | L4    | L5    | L6    | L7    | L8    | L9   |
|----------------------------|-------|-------|-------|-------|-------|-------|-------|-------|-------|-------|-------|-------|-------|------|
| Hydroxytyrosol             | 32.2  | 4.88  | 3.56  | 35.6  | 1.27  | 3.43  | 5.68  | 6.12  | 5.19  | BDL   | 4.98  | 14.4  | 19.7  | 3.8  |
| Tyrosol                    | 39.1  | BDL   | 10.5  | 8.84  | 5.76  | 3.84  | 19.7  | 6.53  | 5.78  | 3.31  | 7.08  | 11.9  | 7.91  | 8.89 |
| Ferulic acid               | BDL   | BDL   | BDL   | BDL   | 0.32  | BDL   | 0.42  | 0.44  | BDL   | BDL   | BDL   | BDL   | BDL   | 0.56 |
| Oleuropein and derivatives | 30.43 | 22.93 | 4.23  | 5.22  | 22.56 | 16.5  | 9.77  | 18.54 | 13.16 | 8.58  | 3.33  | 6.48  | 53.24 | 3.54 |
| Flavonols                  | 0.99  | 0.63  | BDL   | BDL   | 0.64  | 0.06  | 0.12  | 0.21  | 0.7   | 0.27  | BDL   | BDL   | 0.71  | BDL  |
|                            | L10   | L11   | L12   | L13   | M1    | P1    | P2    | P3    | P4    | P5    | S1    | T1    | T2    | U1   |
| Hydroxytyrosol             | 4.64  | BDL   | 13.10 | 3.65  | 2.95  | 8.34  | BDL   | 5.84  | 3.07  | BDL   | 2.28  | 10.70 | 13.50 | BDL  |
| Tyrosol                    | 1.75  | 3.66  | 5.16  | 2.32  | 1.45  | 13.80 | 2.66  | 11.50 | 16.60 | 9.24  | 15.30 | 7.07  | 15.90 | 5.23 |
| Ferulic acid               | BDL   | BDL   | 4.09  | BDL   | BDL   | 1.33  | BDL   | BDL   | 0.71  | BDL   | BDL   | BDL   | BDL   | BDL  |
| Oleuropein and derivatives | BDL   | 14.50 | 5.36  | 16.47 | 3.32  | 41.20 | 6.48  | 2.82  | 22.42 | 13.46 | 5.98  | 22.20 | 52.33 | 4.07 |
| Flavonols                  | BDL   | 0.18  | 0.03  | 0.24  | 0.12  | 0.57  | 0.04  | 0.09  | 0.26  | 0.24  | 0.23  | BDL   | 0.17  | 0.58 |
|                            | Ar    | Au    | Ca    | Cc    | Ce    | Cp    | Ct    | Cv    | Ds    | Fb    | Ma    | Pa    | Sa    |      |
| Hydroxytyrosol             | 14.10 | 9.50  | 6.01  | 4.71  | 6.06  | 13.30 | 20.20 | BDL   | 15.40 | 1.75  | 16.60 | 2.36  | 12.50 |      |
| Tyrosol                    | 8.36  | 13.50 | 11.60 | 12.50 | BDL   | 2.22  | 27.20 | 11.50 | 22.60 | 2.52  | 12.70 | 7.72  | BDL   |      |
| Ferulic acid               | 0.86  | 0.77  | 0.91  | 0.89  | BDL   | 0.50  | 1.04  | 0.83  | BDL   | BDL   | 0.36  | 0.46  | 1.04  |      |
| Oleuropein and derivatives | BDL   | 24.80 | 37.58 | 30.40 | 23.70 | 56.20 | 55.20 | 16.95 | 70.40 | 0.82  | 44.50 | 18.59 | 43.00 |      |
| Flavonols                  | 0.25  | 0.41  | 0.50  | 0.18  | 0.44  | BDL   | 0.52  | 0.30  | 0.23  | 0.13  | 0.32  | 0.63  | 1.33  |      |
|                            | Aa    | Ac    | Ai    | Be    | Cf    | Cm    | Co    | Cr    | Dc    | Dn    | Gi    | Lr    | Sp    |      |
| Hydroxytyrosol             | 5.38  | 4.68  | 5.58  | 17.10 | 8.80  | BDL   | 13.00 | 10.10 | 9.04  | 10.50 | 9.25  | 10.90 | 9.04  |      |
| Tyrosol                    | 5.60  | 31.40 | 9.03  | 14.60 | 4.78  | 4.87  | 20.00 | 13.80 | 10.50 | 13.20 | 11.60 | 9.49  | 22.70 |      |
| Ferulic acid               | 0.58  | BDL   | 0.71  | 0.70  | BDL   | BDL   | BDL   | 0.50  | 0.34  | 0.30  | 0.28  | 0.64  | 1.49  |      |

**Oleuropein**

7.54 12.29 26.00 24.10 2.17 9.13 21.70 21.42 33.20 21.30 20.22 69.60 21.24

**and derivatives**

**Flavonols**

0.05 0.05 0.24 0.53 BDL 0.33 0.28 0.30 0.48 0.28 0.46 1.29 0.64

**BDL\*** below detection limit

**Table S4.** HPLC-DAD analysis of the analysed samples.



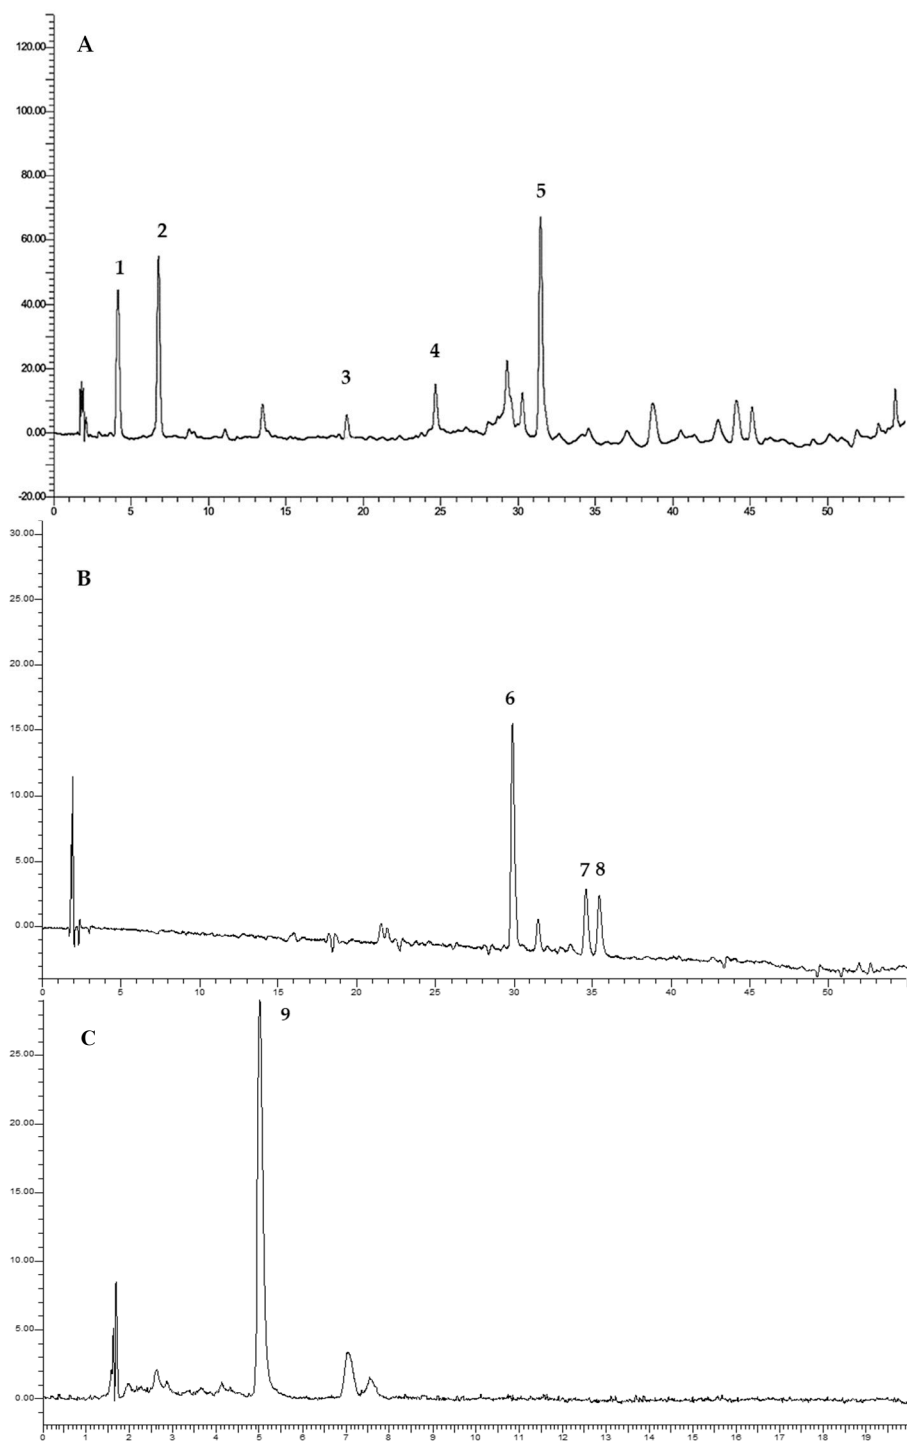

**Figure S3.** Example chromatograms of a selected sample: (Panel A, 280 nm, hydroxytyrosol (1), tyrosol (2), ferulic acid (3), oleuropein (4) and oleuropein derivative (5); Panel B, 360 nm, quercetin-3-D-galactoside (6), quercetin derivative (7), kaempferol derivative (8); Panel C, 450 nm, lutein (9)).

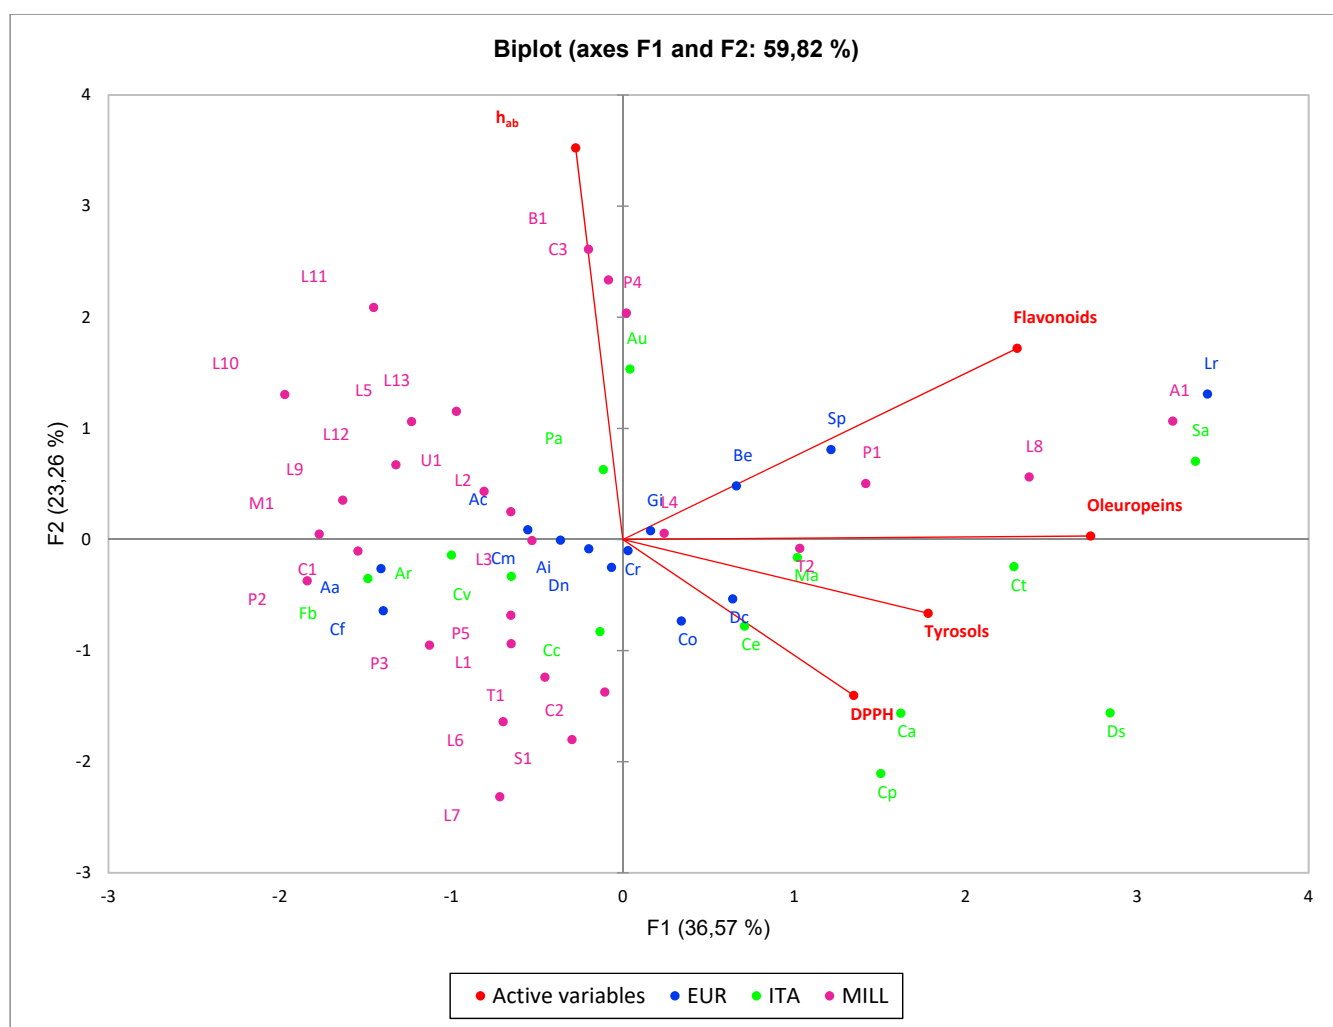

**Figure S4.** Principal component analysis (PCA) correlating quality variables with  $h_{ab}$ .

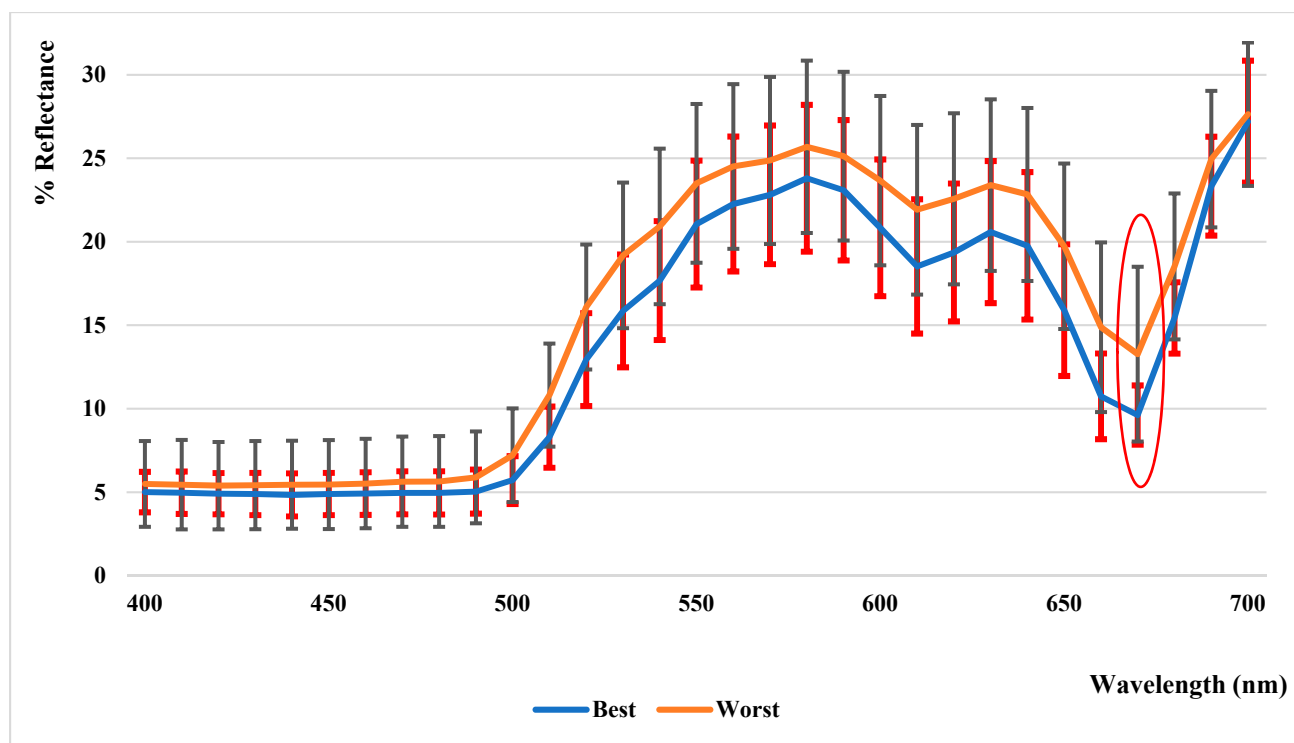

Figure S5. Reflectance curves of the two individuated clusters, associated to best or worst oil quality
